# Supplementary material for: An early clinical trial of Salirasib, an oral RAS inhibitor, in Japanese patients with relapsed/refractory solid tumors
Source: Springer Nature journal article supplement (doi:10.1007/s00280-018-3618-4), 2018-07-10
Supplement: MOESM1 [file 15942070]

## Supplementary material (online only)

Article title            An early clinical trial of Salirasib, an oral Ras inhibitor, in Japanese patients with relapsed/refractory solid tumors

Journal name            Cancer Chemotherapy and Pharmacology

Author names            Junji Furuse, Takayasu Kurata, Naohiro Okano, Yasuhito Fujisaka, Daisuke Naruge, Toshio Shimizu, Hiroshi Kitamura, Tsutomu Iwasa, Fumio Nagashima and Kazuhiko Nakagawa

Affiliation and e-mail address of the corresponding author  
                                  Junji Furuse, Department of Medical Oncology Kyorin University School of Medicine,  
                                  jfuruse@ks.kyorin-u.ac.jp.

### Supplementary Table S1

#### Safety evaluation schedule

|                                       | Screening       | First regimen   |                 |                 |                 |                 |                  |    |    |    | Repeated regimen |   |    |    | At discontinuation |
|---------------------------------------|-----------------|-----------------|-----------------|-----------------|-----------------|-----------------|------------------|----|----|----|------------------|---|----|----|--------------------|
| Day                                   | -14 to -1       | 1* <sup>1</sup> | 1* <sup>2</sup> | 2* <sup>1</sup> | 4* <sup>1</sup> | 7* <sup>1</sup> | 14* <sup>1</sup> | 21 | 22 | 28 | 1                | 8 | 22 | 28 |                    |
| Written informed consent              | X* <sup>3</sup> |                 |                 |                 |                 |                 |                  |    |    |    | X* <sup>4</sup>  |   |    |    |                    |
| Body weight                           | X               |                 |                 |                 |                 | X               |                  | X  | X  |    | X                | X | X  |    | X                  |
| Systolic and diastolic blood pressure |                 | X               | X* <sup>5</sup> | X               | X               | X               | X                |    | X  | X  |                  | X | X  | X  | X                  |
| Pulse rate                            |                 | X               | X* <sup>5</sup> | X               | X               | X               | X                |    | X  | X  |                  | X | X  | X  | X                  |
| Body temperature                      |                 | X               | X* <sup>5</sup> | X               | X               | X               | X                |    | X  | X  |                  | X | X  | X  | X                  |

|                                                             | Screening | First regimen   |                  |                 |                 |                 |                  |    |                  |    | Repeated regimen |                 |    |    | At discontinuation |
|-------------------------------------------------------------|-----------|-----------------|------------------|-----------------|-----------------|-----------------|------------------|----|------------------|----|------------------|-----------------|----|----|--------------------|
| Day                                                         | -14 to -1 | 1* <sup>1</sup> | 1* <sup>2</sup>  | 2* <sup>1</sup> | 4* <sup>1</sup> | 7* <sup>1</sup> | 14* <sup>1</sup> | 21 | 22               | 28 | 1                | 8               | 22 | 28 |                    |
| 12-lead electrocardiogram                                   | X         | X* <sup>6</sup> | X                | X               | X               | X               | X                | X  | X                | X  | X                | X               | X  | X  | X                  |
| Pregnancy test                                              | X         |                 |                  |                 |                 |                 |                  |    |                  | X  |                  |                 |    | X  | X                  |
| ECOG performance status                                     | X         |                 |                  |                 |                 | X               | X                | X  | X                | X  | X                | X               | X  | X  | X                  |
| General clinical test                                       | X         |                 | X                | X               | X               | X               | X                | X  | X                | X  | X* <sup>7</sup>  | X               | X  | X  | X                  |
| Tumor evaluation by CT, MRI, and tumor marker test          | X         |                 |                  |                 |                 |                 |                  |    | X                |    |                  | X* <sup>8</sup> |    |    | X                  |
| Chest X-ray                                                 | X         |                 |                  |                 |                 |                 |                  |    | X                |    |                  | X               |    |    | X                  |
| Tumor biopsy                                                | (X)       |                 |                  |                 |                 |                 |                  |    |                  |    |                  |                 |    |    |                    |
| Blood sampling for pharmacokinetic evaluation               |           | X* <sup>9</sup> | X* <sup>10</sup> | X               | X               | X               | X                | X  | X* <sup>11</sup> |    |                  |                 |    |    |                    |
| Urine sampling for pharmacokinetic evaluation <sup>12</sup> |           | X               | X                |                 |                 |                 |                  |    |                  |    |                  |                 |    |    |                    |
| Gene expression analyses                                    | X         |                 |                  | X               |                 |                 |                  |    | X                | X  |                  | X               | X  |    | X                  |
| AE monitoring                                               |           | Continuous      |                  |                 |                 |                 |                  |    |                  |    |                  |                 |    |    |                    |

X: Required item; (X): Optional item (examined only with written agreement provided by patients).

\*<sup>1</sup>Pre-administration (morning dose).

\*<sup>2</sup>Post-administration.

\*<sup>3</sup>Test drug administration was commenced within 30 days after patients provided written informed consent.

\*<sup>4</sup>Only patients who provided written consent after completing the first regimen entered the repeated-dose period.

\*<sup>5</sup>Measurements were carried out at 0.5, 1, 1.5, 2, 4, 6, and 8 hours after drug administration.

\*<sup>6</sup>Measurements were carried out at 1, 2, 4, 6, and 8 hours after administration.

\*<sup>7</sup>No qualitative urine analyses.

\*<sup>8</sup>CT or MRI imaging was obligated to be carried out once every two regimens (in odd-number regimens).

\*<sup>9</sup>With written agreement, blood samples for genotyping were also collected.

\*<sup>10</sup>Blood samples were collected at 0.5, 1, 1.5, 2, 4, 6, 8, and 12 hours after drug administration.

\*<sup>11</sup>Blood samples were collected before administration (morning), and at 0.5, 1, 1.5, 2, 4, 6, 8, and 12 hours after administration (before evening administration).

\*<sup>12</sup>Urine samples were collected from patients who received 200, 600, and 1000 mg of salirasib on day 1 (before drug administration; 0–6, 6–12, 12–24 hours post-administration).

## Supplementary Table S2

Items examined in the clinical laboratory tests

| Clinical test           | Items                                                                                                                                                                                             |
|-------------------------|---------------------------------------------------------------------------------------------------------------------------------------------------------------------------------------------------|
| Blood chemical analyses | Na, K, Cl, Ca, P, Mg, BUN, creatinine, blood glucose, total protein, albumin, total bilirubin, $\gamma$ -GTP, AST (GOT), ALT (GPT), ALP, LDH, total cholesterol, triglyceride, cardiac troponin T |
| Hematologic tests       | Hemoglobin, hematocrit, RBC count, WBC count, lymph count, monocyte count, neutrophil count, eosinophil count, basophil count, platelet count                                                     |
| Urine analyses          | Protein, glucose, urobilinogen, pH, ketone bodies, occult blood                                                                                                                                   |

### Supplementary Table S3

#### Summary statistics of patient characteristics

|                       | 100 mg        | 200 mg        | 400 mg         | 600 mg        | 800 mg         | 1000 mg       | Total         |
|-----------------------|---------------|---------------|----------------|---------------|----------------|---------------|---------------|
| Patients ( <i>N</i> ) | 3             | 3             | 3              | 3             | 6              | 3             | 21            |
| Sex, <i>N</i> (%)     |               |               |                |               |                |               |               |
| Male                  | 1 (33.3)      | 2 (66.7)      | 3 (100.0)      | 1 (33.3)      | 4 (66.7)       | 3 (100.0)     | 14 (66.7)     |
| Female                | 2 (66.7)      | 1 (33.3)      | 0 (0.0)        | 2 (66.7)      | 2 (33.3)       | 0 (0.0)       | 7 (33.3)      |
| Age (years)           |               |               |                |               |                |               |               |
| <65, <i>N</i> (%)     | 1 (33.3)      | 2 (66.7)      | 1 (33.3)       | 1 (33.3)      | 5 (83.3)       | 1 (33.3)      | 11 (52.4)     |
| ≥65, <i>N</i> (%)     | 2 (66.7)      | 1 (33.3)      | 2 (66.7)       | 2 (66.7)      | 1 (16.7)       | 2 (66.7)      | 10 (47.6)     |
| Mean ± SD             | 66.0 ± 12.2   | 64.0 ± 7.8    | 64.3 ± 16.0    | 61.3 ± 15.9   | 60.0 ± 11.3    | 61.7 ± 5.8    | 62.5 ± 10.6   |
| Median                | 72.0          | 60.0          | 65.0           | 70.0          | 63.0           | 65.0          | 63.0          |
| Range                 | 52–74         | 59–73         | 48–80          | 43–71         | 43–76          | 55–65         | 43–80         |
| Height (cm)           |               |               |                |               |                |               |               |
| Mean ± SD             | 166.20 ± 7.76 | 161.27 ± 6.01 | 162.80 ± 11.09 | 160.47 ± 7.20 | 160.98 ± 11.01 | 171.80 ± 6.95 | 163.50 ± 8.82 |
| Median                | 166.70        | 158.10        | 161.20         | 162.40        | 161.55         | 171.50        | 163.80        |
| Range                 | 158.2–173.7   | 157.5–168.2   | 152.6–174.6    | 152.5–166.5   | 147.6–176.9    | 165.0–178.9   | 147.6–178.9   |
| Weight (kg)           |               |               |                |               |                |               |               |
| Mean ± SD             | 62.20 ± 3.82  | 62.07 ± 9.38  | 50.47 ± 9.81   | 52.23 ± 6.79  | 59.72 ± 7.79   | 66.83 ± 15.71 | 59.03 ± 9.72  |
| Median                | 61.80         | 64.20         | 48.80          | 54.50         | 59.00          | 66.10         | 58.80         |
| Range                 | 58.6–66.2     | 51.8–70.2     | 41.6–61.0      | 44.6–57.6     | 51.1–71.2      | 51.5–82.9     | 41.6–82.9     |

|                                               | 100 mg        | 200 mg        | 400 mg        | 600 mg         | 800 mg         | 1000 mg       | Total         |
|-----------------------------------------------|---------------|---------------|---------------|----------------|----------------|---------------|---------------|
| Patients (N)                                  | 3             | 3             | 3             | 3              | 6              | 3             | 21            |
| Body surface area (m <sup>2</sup> )           |               |               |               |                |                |               |               |
| Mean ± SD                                     | 1.692 ± 0.058 | 1.653 ± 0.146 | 1.525 ± 0.201 | 1.529 ± 0.079  | 1.626 ± 0.167  | 1.783 ± 0.232 | 1.634 ± 0.164 |
| Median                                        | 1.704         | 1.655         | 1.494         | 1.540          | 1.637          | 1.777         | 1.629         |
| Range                                         | 1.63–1.74     | 1.51–1.80     | 1.34–1.74     | 1.45–1.60      | 1.44–1.88      | 1.55–2.02     | 1.34–2.02     |
| BMI (kg/m <sup>2</sup> )                      |               |               |               |                |                |               |               |
| Mean ± SD                                     | 22.65 ± 2.83  | 23.79 ± 2.56  | 18.88 ± 1.08  | 20.45 ± 3.99   | 23.00 ± 1.23   | 22.43 ± 3.49  | 22.03 ± 2.73  |
| Median                                        | 23.82         | 24.81         | 18.78         | 19.66          | 22.96          | 22.47         | 22.62         |
| Range                                         | 19.4–24.7     | 20.9–25.7     | 17.9–20.0     | 16.9–24.8      | 21.0–24.6      | 18.9–25.9     | 16.9–25.9     |
| Time from primary diagnosis (days)            |               |               |               |                |                |               |               |
| Mean ± SD                                     | 656.3 ± 188.3 | 800.0 ± 601.1 | 819.3 ± 421.4 | 1161.7 ± 610.7 | 1016.2 ± 339.2 | 727.3 ± 456.1 | 885.3 ± 417.4 |
| Median                                        | 700.0         | 1137.0        | 939.0         | 1249.0         | 927.5          | 870.0         | 870.0         |
| Range                                         | 450–819       | 106–1157      | 351–1168      | 512–1724       | 667–1529       | 217–1095      | 106–1724      |
| ECOG performance status, N (%)                |               |               |               |                |                |               |               |
| 0                                             | 3 (100.0)     | 3 (100.0)     | 2 (66.7)      | 2 (66.7)       | 5 (83.3)       | 1 (33.3)      | 16 (76.2)     |
| 1                                             | 0 (0.0)       | 0 (0.0)       | 1 (33.3)      | 1 (33.3)       | 1 (16.7)       | 2 (66.7)      | 5 (23.8)      |
| 2                                             | 0 (0.0)       | 0 (0.0)       | 0 (0.0)       | 0 (0.0)        | 0 (0.0)        | 0 (0.0)       | 0 (0.0)       |
| Smoking (number of cigarettes per day), N (%) |               |               |               |                |                |               |               |
| None                                          | 3 (100.0)     | 3 (100.0)     | 2 (66.7)      | 3 (100.0)      | 5 (83.3)       | 2 (66.7)      | 18 (85.7)     |
| <5                                            | 0 (0.0)       | 0 (0.0)       | 0 (0.0)       | 0 (0.0)        | 0 (0.0)        | 0 (0.0)       | 0 (0.0)       |
| ≥5–<20                                        | 0 (0.0)       | 0 (0.0)       | 1 (33.3)      | 0 (0.0)        | 1 (16.7)       | 1 (33.3)      | 3 (14.3)      |
| ≥20                                           | 0 (0.0)       | 0 (0.0)       | 0 (0.0)       | 0 (0.0)        | 0 (0.0)        | 0 (0.0)       | 0 (0.0)       |

|                                      | 100 mg    | 200 mg   | 400 mg   | 600 mg    | 800 mg   | 1000 mg  | Total     |
|--------------------------------------|-----------|----------|----------|-----------|----------|----------|-----------|
| Patients (N)                         | 3         | 3        | 3        | 3         | 6        | 3        | 21        |
| Alcohol consumption frequency, N (%) |           |          |          |           |          |          |           |
| None                                 | 3 (100.0) | 1 (33.3) | 1 (33.3) | 3 (100.0) | 4 (66.7) | 2 (66.7) | 14 (66.7) |
| 3–4 times/<br>month                  | 0 (0.0)   | 2 (66.7) | 1 (33.3) | 0 (0.0)   | 0 (0.0)  | 0 (0.0)  | 3 (14.3)  |
| 3–4 times/<br>week                   | 0 (0.0)   | 0 (0.0)  | 0 (0.0)  | 0 (0.0)   | 0 (0.0)  | 0 (0.0)  | 0 (0.0)   |
| Once/ day                            | 0 (0.0)   | 0 (0.0)  | 1 (33.3) | 0 (0.0)   | 2 (33.3) | 1 (33.3) | 4 (19.0)  |
| Tumor type, N (%)                    |           |          |          |           |          |          |           |
| Lung                                 | 0 (0.0)   | 0 (0.0)  | 0 (0.0)  | 0 (0.0)   | 0 (0.0)  | 0 (0.0)  | 0 (0.0)   |
| Pancreas                             | 2 (66.7)  | 0 (0.0)  | 1 (33.3) | 1 (33.3)  | 0 (0.0)  | 1 (33.3) | 5 (23.8)  |
| Colorectal                           | 0 (0.0)   | 1 (33.3) | 0 (0.0)  | 2 (66.7)  | 4 (66.7) | 0 (0.0)  | 7 (33.3)  |
| Stomach                              | 0 (0.0)   | 0 (0.0)  | 0 (0.0)  | 0 (0.0)   | 0 (0.0)  | 0 (0.0)  | 0 (0.0)   |
| Esophagus                            | 0 (0.0)   | 0 (0.0)  | 0 (0.0)  | 0 (0.0)   | 0 (0.0)  | 1 (33.3) | 1 (4.8)   |
| Biliary tract                        | 0 (0.0)   | 2 (66.7) | 1 (33.3) | 0 (0.0)   | 1 (16.7) | 0 (0.0)  | 4 (19.0)  |
| Liver                                | 0 (0.0)   | 0 (0.0)  | 0 (0.0)  | 0 (0.0)   | 0 (0.0)  | 0 (0.0)  | 0 (0.0)   |
| Others                               | 1 (33.3)  | 0 (0.0)  | 1 (33.3) | 0 (0.0)   | 1 (16.7) | 1 (33.3) | 4 (19.0)  |
| Stage of cancer, N (%)               |           |          |          |           |          |          |           |
| IV                                   | 3 (100.0) | 1 (33.3) | 1 (33.3) | 2 (66.7)  | 1 (16.7) | 1 (33.3) | 9 (42.9)  |
| IVB                                  | 0 (0.0)   | 1 (33.3) | 0 (0.0)  | 0 (0.0)   | 1 (16.7) | 0 (0.0)  | 2 (9.5)   |
| Refractory                           | 0 (0.0)   | 1 (33.3) | 2 (66.7) | 1 (33.3)  | 4 (66.7) | 2 (66.7) | 10 (47.6) |

|                                         | 100 mg   | 200 mg    | 400 mg   | 600 mg   | 800 mg    | 1000 mg  | Total     |
|-----------------------------------------|----------|-----------|----------|----------|-----------|----------|-----------|
| Patients (N)                            | 3        | 3         | 3        | 3        | 6         | 3        | 21        |
| Histopathological classification, N (%) |          |           |          |          |           |          |           |
| Small round cell tumor                  | 1 (33.3) | 0 (0.0)   | 0 (0.0)  | 0 (0.0)  | 0 (0.0)   | 0 (0.0)  | 1 (4.8)   |
| Invasive ductal carcinoma               | 0 (0.0)  | 0 (0.0)   | 0 (0.0)  | 1 (33.3) | 0 (0.0)   | 0 (0.0)  | 1 (4.8)   |
| Adenocarcinoma                          | 2 (66.7) | 3 (100.0) | 2 (66.7) | 2 (66.7) | 5 (83.3)  | 1 (33.3) | 15 (71.4) |
| Clear cell carcinoma                    | 0 (0.0)  | 0 (0.0)   | 1 (33.3) | 0 (0.0)  | 0 (0.0)   | 0 (0.0)  | 1 (4.8)   |
| Squamous cell carcinoma                 | 0 (0.0)  | 0 (0.0)   | 0 (0.0)  | 0 (0.0)  | 0 (0.0)   | 1 (33.3) | 1 (4.8)   |
| Acral lentiginous melanoma              | 0 (0.0)  | 0 (0.0)   | 0 (0.0)  | 0 (0.0)  | 0 (0.0)   | 1 (33.3) | 1 (4.8)   |
| Unknown                                 | 0 (0.0)  | 0 (0.0)   | 0 (0.0)  | 0 (0.0)  | 1 (16.7)  | 0 (0.0)  | 1 (4.8)   |
| TNM staging (T) at study onset, N (%)   |          |           |          |          |           |          |           |
| T0                                      | 1 (33.3) | 2 (66.7)  | 2 (66.7) | 2 (66.7) | 6 (100.0) | 2 (66.7) | 15 (71.4) |
| T3                                      | 1 (33.3) | 1 (33.3)  | 1 (33.3) | 0 (0.0)  | 0 (0.0)   | 0 (0.0)  | 3 (14.3)  |
| T4                                      | 1 (33.3) | 0 (0.0)   | 0 (0.0)  | 1 (33.3) | 0 (0.0)   | 1 (33.3) | 3 (14.3)  |



|                                       | 100 mg   | 200 mg    | 400 mg    | 600 mg    | 800 mg    | 1000 mg  | Total     |
|---------------------------------------|----------|-----------|-----------|-----------|-----------|----------|-----------|
| Patients (N)                          | 3        | 3         | 3         | 3         | 6         | 3        | 21        |
| TNM staging (N) at study onset, N (%) |          |           |           |           |           |          |           |
| N0                                    | 1 (33.3) | 2 (66.7)  | 2 (66.7)  | 3 (100.0) | 3 (50.0)  | 0 (0.0)  | 11 (52.4) |
| N1                                    | 2 (66.7) | 1 (33.3)  | 1 (33.3)  | 0 (0.0)   | 1 (16.7)  | 1 (33.3) | 6 (28.6)  |
| N2                                    | 0 (0.0)  | 0 (0.0)   | 0 (0.0)   | 0 (0.0)   | 0 (0.0)   | 1 (33.3) | 1 (4.8)   |
| N2b                                   | 0 (0.0)  | 0 (0.0)   | 0 (0.0)   | 0 (0.0)   | 2 (33.3)  | 0 (0.0)  | 2 (9.5)   |
| N3                                    | 0 (0.0)  | 0 (0.0)   | 0 (0.0)   | 0 (0.0)   | 0 (0.0)   | 1 (33.3) | 1 (4.8)   |
| TNM staging (M) at study onset, N (%) |          |           |           |           |           |          |           |
| M0                                    | 0 (0.0)  | 0 (0.0)   | 0 (0.0)   | 0 (0.0)   | 1 (16.7)  | 0 (0.0)  | 1 (4.8)   |
| M1                                    | 2 (66.7) | 3 (100.0) | 3 (100.0) | 3 (100.0) | 2 (33.3)  | 2 (66.7) | 15 (71.4) |
| M1b                                   | 1 (33.3) | 0 (0.0)   | 0 (0.0)   | 0 (0.0)   | 3 (50.0)  | 0 (0.0)  | 4 (19.0)  |
| M1c                                   | 0 (0.0)  | 0 (0.0)   | 0 (0.0)   | 0 (0.0)   | 0 (0.0)   | 1 (33.3) | 1 (4.8)   |
| Treatment history: surgery*, N (%)    |          |           |           |           |           |          |           |
| 0                                     | 2 (66.7) | 1 (33.3)  | 1 (33.3)  | 0 (0.0)   | 0 (0.0)   | 1 (33.3) | 5 (23.8)  |
| ≥1                                    | 1 (33.3) | 2 (66.7)  | 2 (66.7)  | 3 (100.0) | 6 (100.0) | 2 (66.7) | 16 (76.2) |
| Complete resection*                   |          |           |           |           |           |          |           |
|                                       | 0 (0.0)  | 1 (33.3)  | 2 (66.7)  | 1 (33.3)  | 4 (66.7)  | 2 (66.7) | 10 (47.6) |
| Residual tumor present*               |          |           |           |           |           |          |           |
|                                       | 0 (0.0)  | 1 (33.3)  | 0 (0.0)   | 2 (66.7)  | 3 (50.0)  | 1 (33.3) | 7 (33.3)  |
| Unknown*                              | 1 (33.3) | 0 (0.0)   | 0 (0.0)   | 0 (0.0)   | 2 (33.3)  | 0 (0.0)  | 3 (14.3)  |

|                                        | 100 mg    | 200 mg    | 400 mg    | 600 mg    | 800 mg    | 1000 mg   | Total      |
|----------------------------------------|-----------|-----------|-----------|-----------|-----------|-----------|------------|
| Patients (N)                           | 3         | 3         | 3         | 3         | 6         | 3         | 21         |
| Treatment history: radiotherapy, N (%) |           |           |           |           |           |           |            |
| 0                                      | 2 (66.7)  | 2 (66.7)  | 3 (100.0) | 3 (100.0) | 6 (100.0) | 2 (66.7)  | 18 (85.7)  |
| ≥1                                     | 1 (33.3)  | 1 (33.3)  | 0 (0.0)   | 0 (0.0)   | 0 (0.0)   | 1 (33.3)  | 3 (14.3)   |
| Prior systemic regimens, N (%)         |           |           |           |           |           |           |            |
| 0                                      | 0 (0.0)   | 0 (0.0)   | 0 (0.0)   | 0 (0.0)   | 0 (0.0)   | 0 (0.0)   | 0 (0.0)    |
| 1                                      | 2 (66.7)  | 0 (0.0)   | 0 (0.0)   | 0 (0.0)   | 0 (0.0)   | 1 (33.3)  | 3 (14.3)   |
| 2                                      | 1 (33.3)  | 1 (33.3)  | 2 (66.7)  | 1 (33.3)  | 1 (16.7)  | 0 (0.0)   | 6 (28.6)   |
| 3                                      | 0 (0.0)   | 0 (0.0)   | 0 (0.0)   | 1 (33.3)  | 1 (16.7)  | 1 (33.3)  | 3 (14.3)   |
| 4                                      | 0 (0.0)   | 1 (33.3)  | 0 (0.0)   | 1 (33.3)  | 1 (16.7)  | 0 (0.0)   | 3 (14.3)   |
| 5                                      | 0 (0.0)   | 0 (0.0)   | 0 (0.0)   | 0 (0.0)   | 1 (16.7)  | 1 (33.3)  | 2 (9.5)    |
| 6                                      | 0 (0.0)   | 1 (33.3)  | 1 (33.3)  | 0 (0.0)   | 2 (33.3)  | 0 (0.0)   | 4 (19.0)   |
| Comorbidities, N (%)                   |           |           |           |           |           |           |            |
| 0                                      | 0 (0.0)   | 0 (0.0)   | 0 (0.0)   | 0 (0.0)   | 0 (0.0)   | 0 (0.0)   | 0 (0.0)    |
| ≥1                                     | 3 (100.0) | 3 (100.0) | 3 (100.0) | 3 (100.0) | 6 (100.0) | 3 (100.0) | 21 (100.0) |
| Past medical history, N (%)            |           |           |           |           |           |           |            |
| 0                                      | 3 (100.0) | 3 (100.0) | 2 (66.7)  | 3 (100.0) | 3 (50.0)  | 1 (33.3)  | 15 (71.4)  |
| ≥1                                     | 0 (0.0)   | 0 (0.0)   | 1 (33.3)  | 0 (0.0)   | 3 (50.0)  | 2 (66.7)  | 6 (28.6)   |
| KRAS mutations determined, N (%)       |           |           |           |           |           |           |            |
|                                        | 0 (0.0)   | 1 (33.3)  | 0 (0.0)   | 3 (100.0) | 0 (0.0)   | 0 (0.0)   | 4 (19.0)   |

\*Multiple answers were counted cumulatively.
